# Supplementary material for: RCoV19: A One-stop Hub for SARS-CoV-2 Genome Data Integration, Variant Monitoring, and Risk Pre-warning
Source: PubMed Central journal article supplement (PMC10928372; doi:10.1016/j.gpb.2023.10.004), 2023-10-26

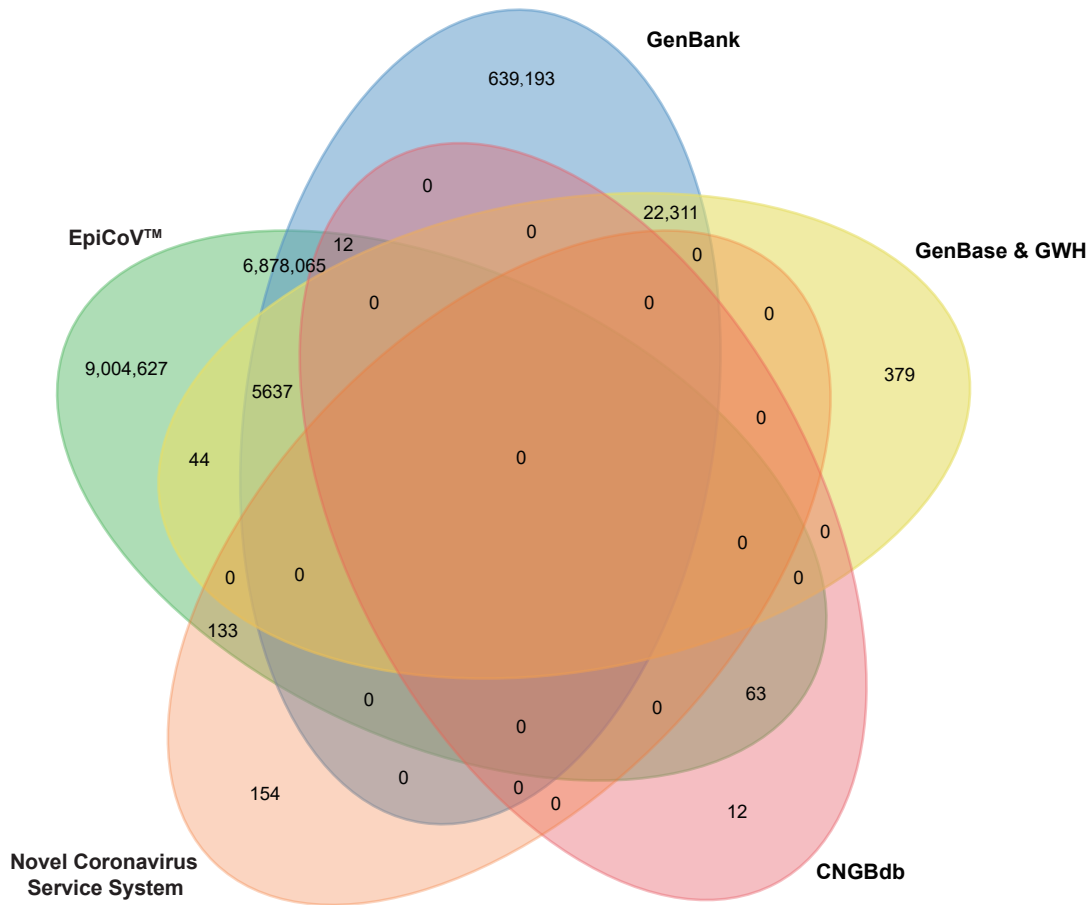

Supplement: mmc1.pdf [file mmc1.pdf]
